# Supplementary figures and images for: Lateral gene transfer leaves lasting traces in Rhizaria
Source: Research Square preprint supplement (doi:10.21203/rs.3.rs-4176859/v1), 2024-03-29

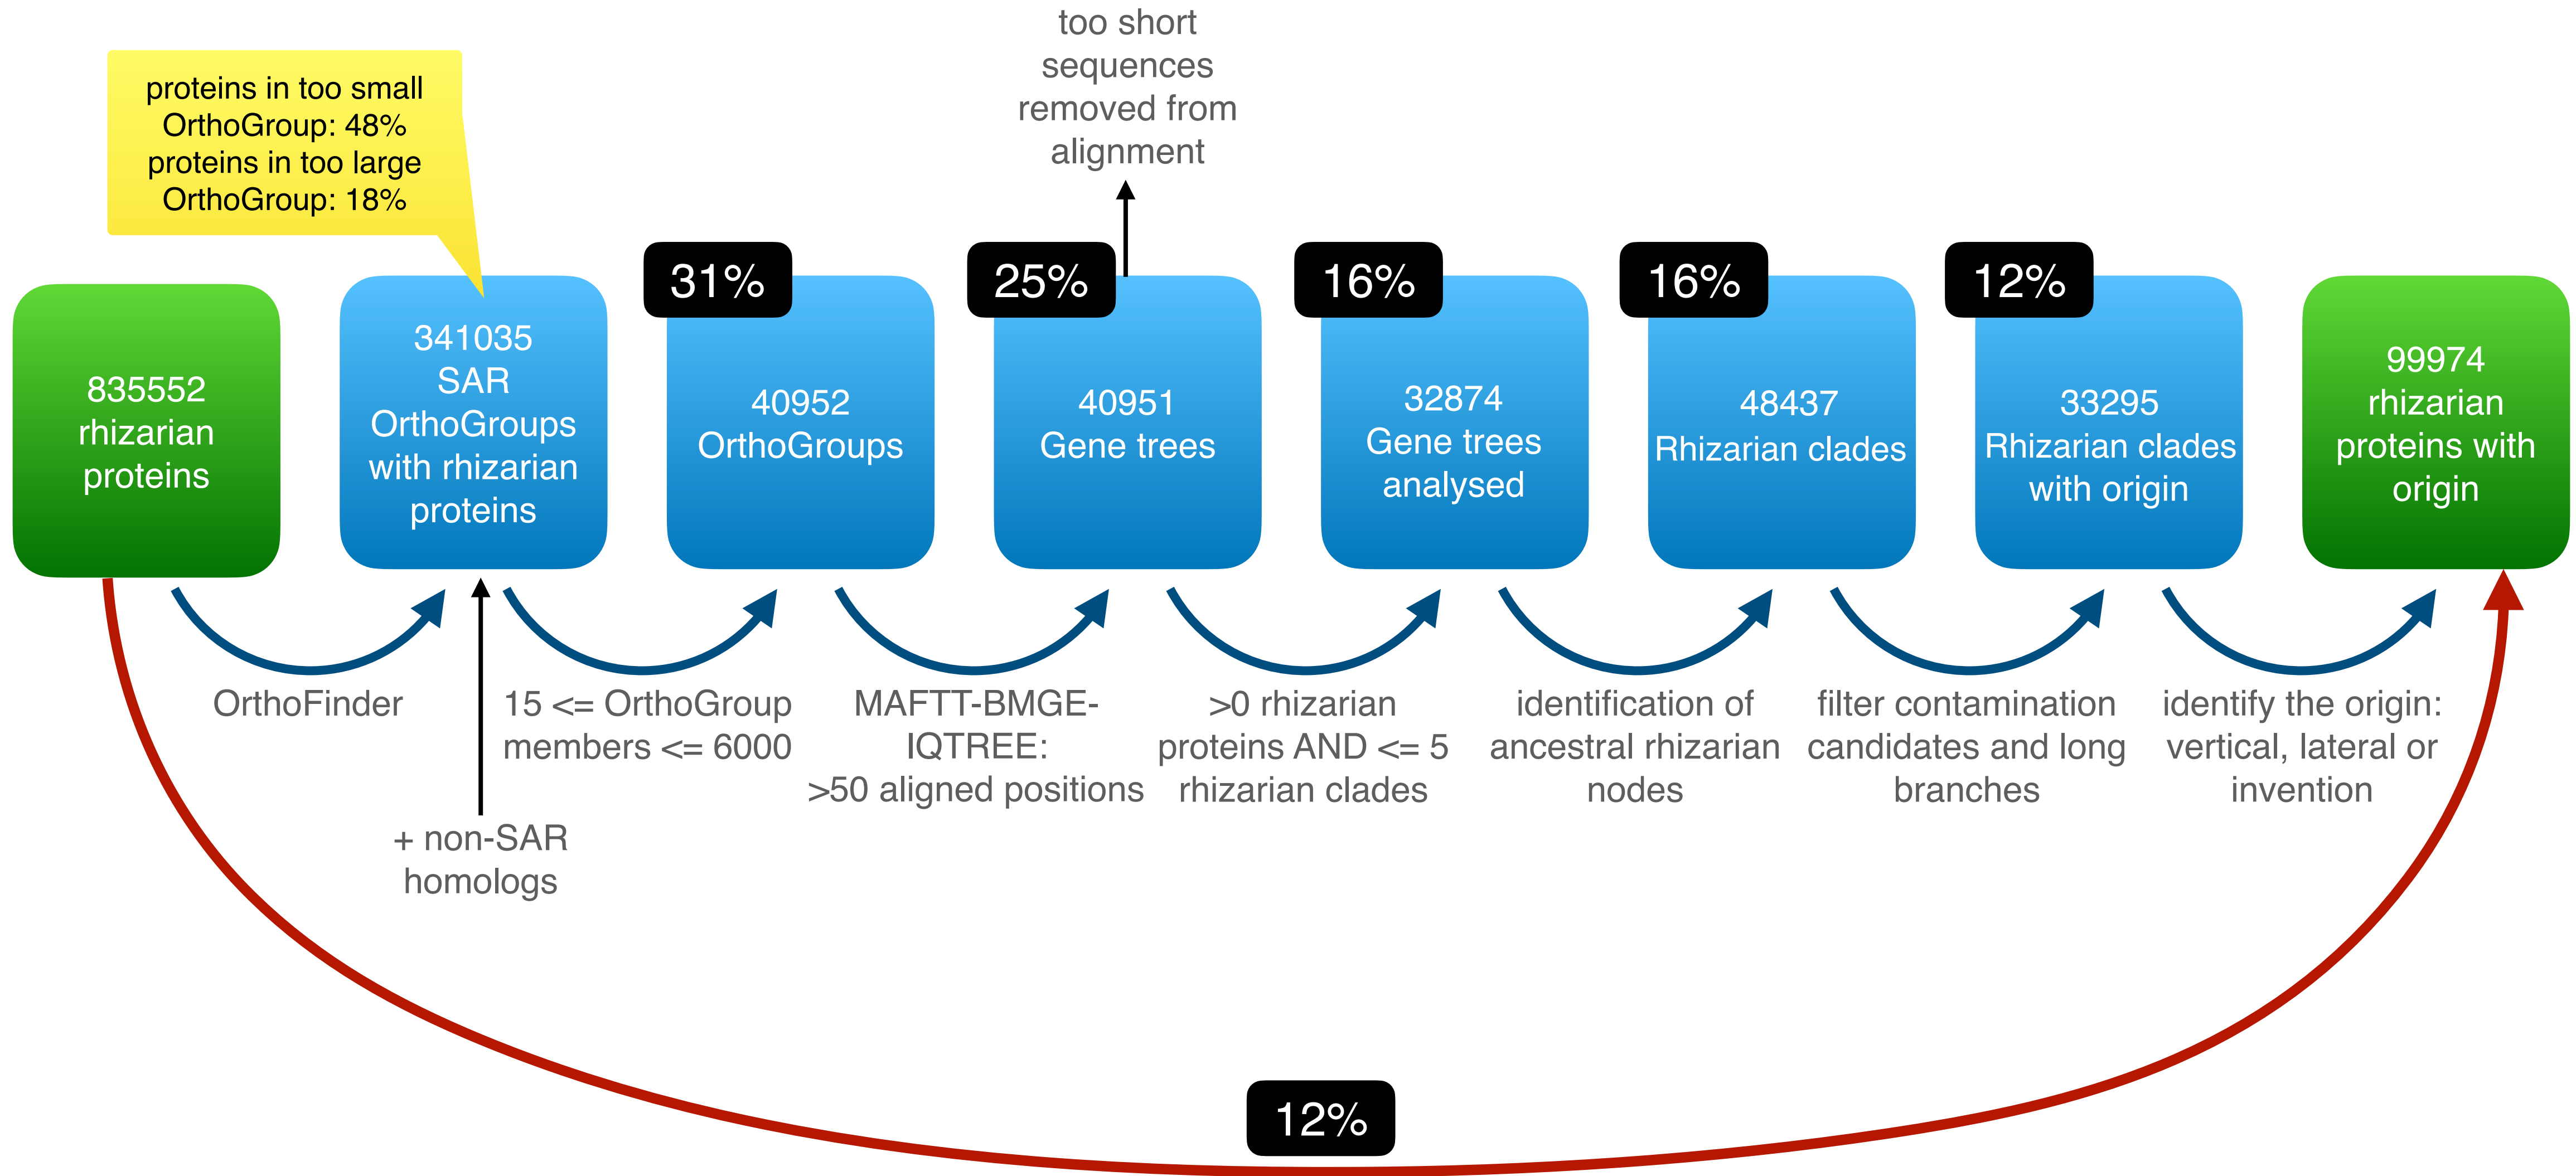

Supplement: Supplementary file 1 [file 603944be74b6c3f63a3f7da7.pdf]
